# Supplementary material for: Accounting for uncertainty when assessing association between copy number and disease: a latent class model
Source: PubMed Central journal article supplement (PMC2707368; doi:10.1186/1471-2105-10-172), 2009-06-06
Supplement: 1471-2105-10-172-S1.pdf [file 1471-2105-10-172-S1.pdf]

Supplementary material of the paper: *Accounting for uncertainty when assessing association between copy number and disease: a latent class model*. Juan R. González, Isaac Subirana, Geòrgia Escaramís, Solymar Peraza, Alejandro Cáceres, Xavier Estivill, Lluís Armengol.

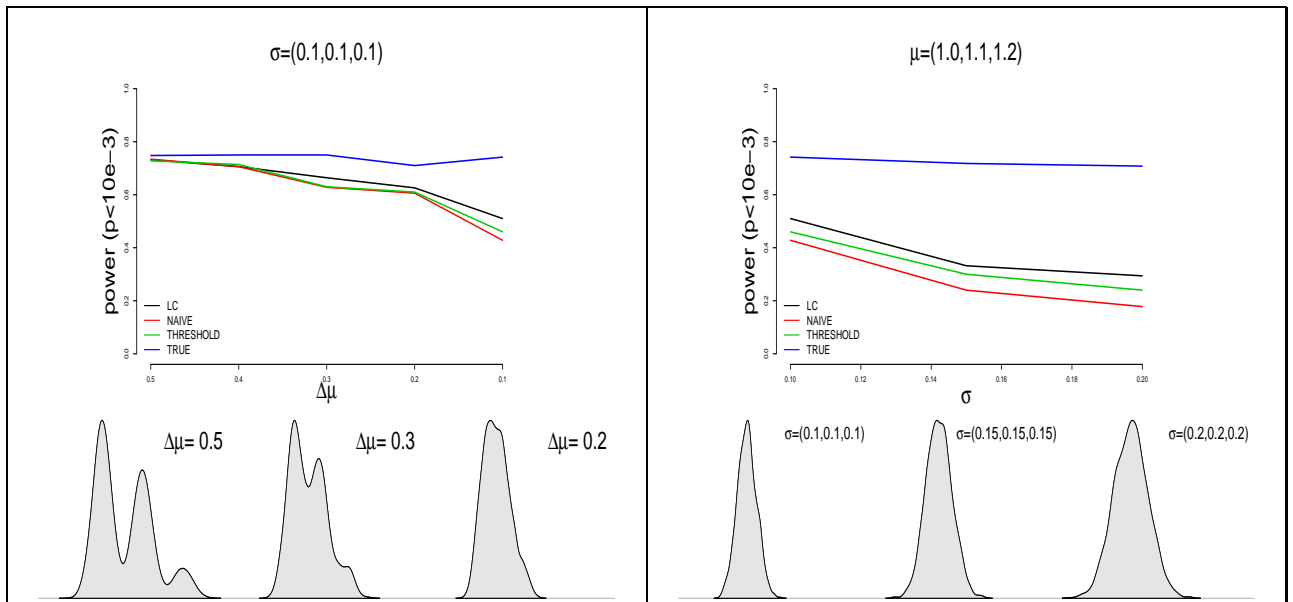

**Figure S1. Empirical power for simulation studies.** Empirical power for the three different approaches analyzed varying the quality of clustering for underlying copy number status. Left panel is for a fixed set of variance and varying means, while the right panel is for a fixed mean and varying variances.

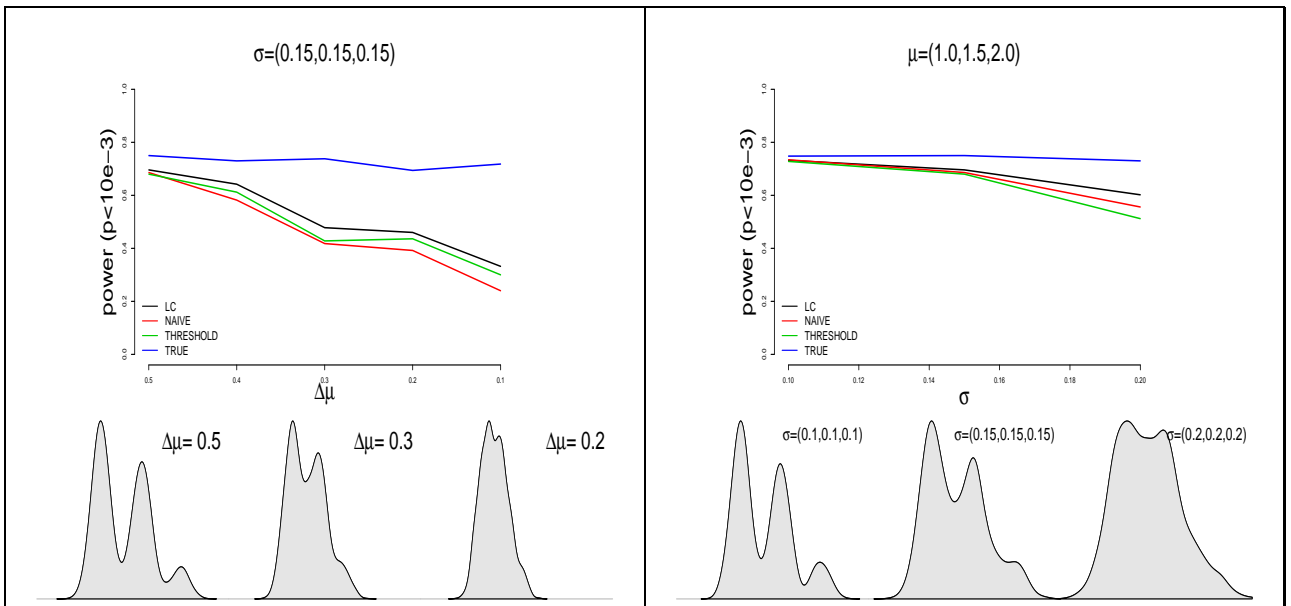

**Figure S2. Empirical power for simulation studies.** Empirical power for the three different approaches analyzed varying the quality of clustering for underlying copy number status. Left panel is for a fixed set of variance and varying means, while the right panel is for a fixed mean and varying variances.

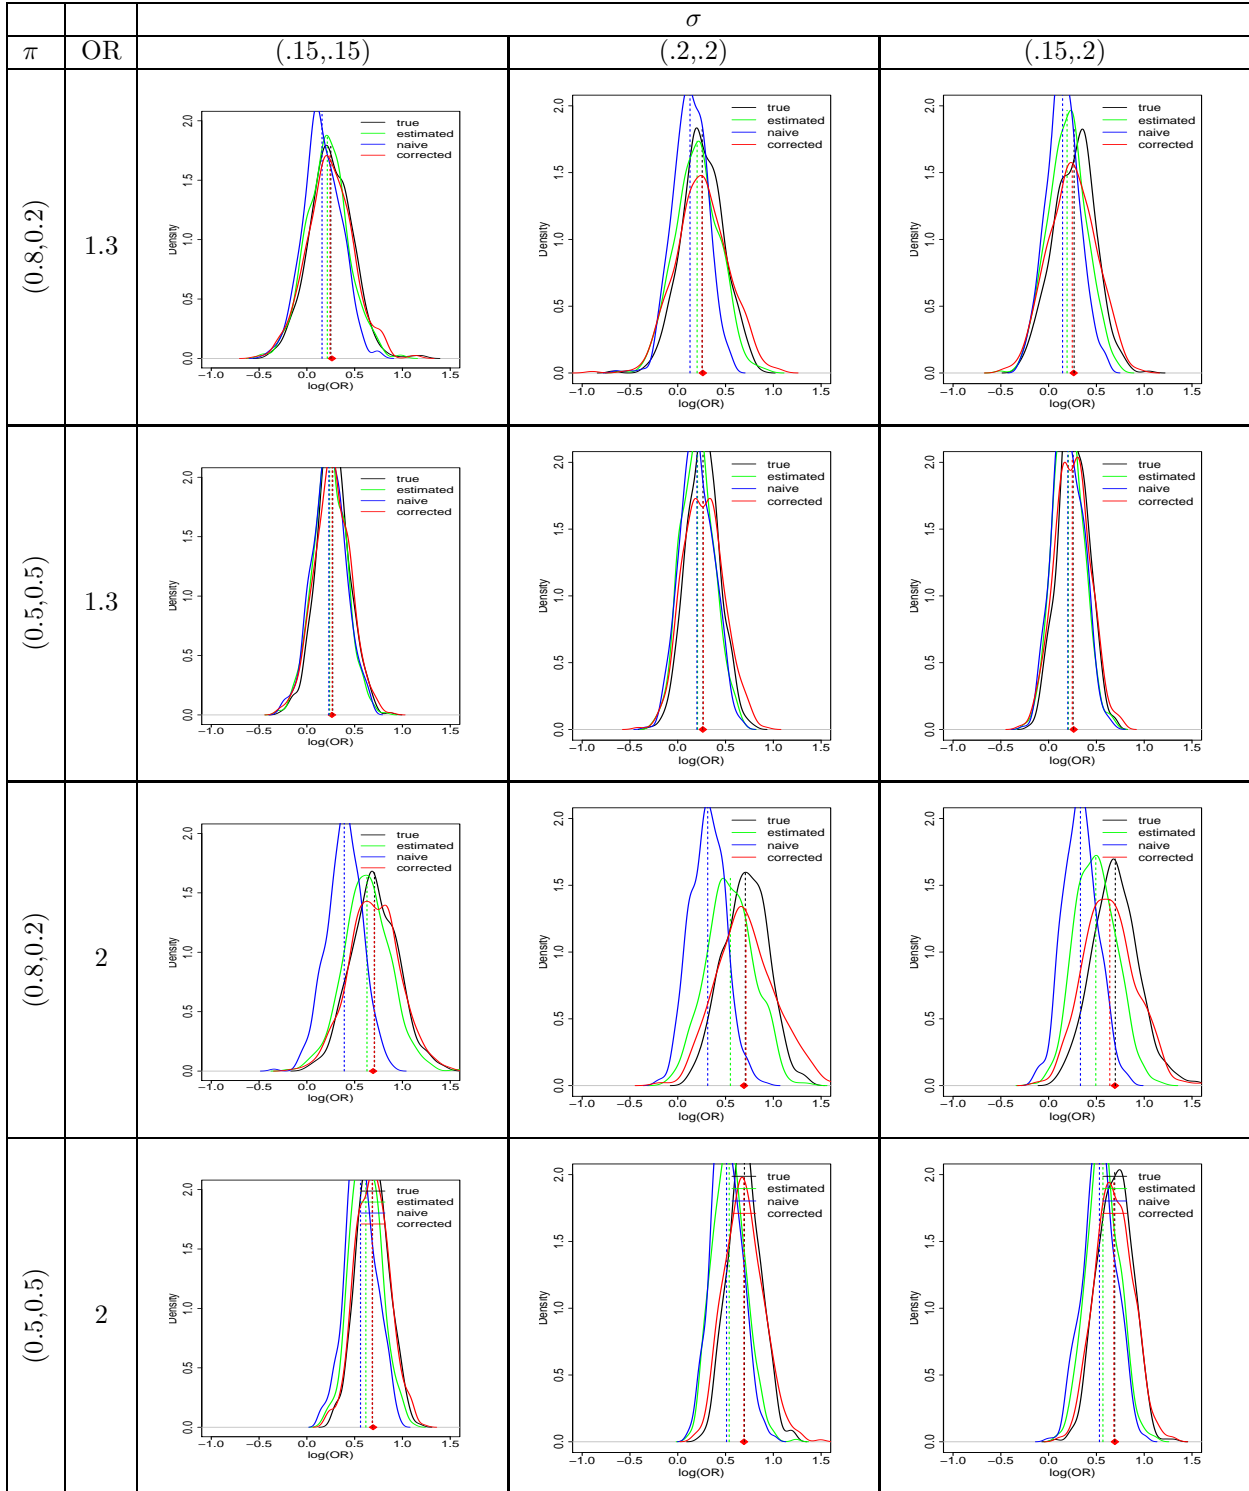

**Figure S3. Empirical distribution of effect estimates (log OR) for each copy number status.** Results for 1000 simulated case-control data sets (300/300), for different degrees of association (e.g. different OR) and different distributions of quantitative CNV measurements (e.g. varying clustering quality)

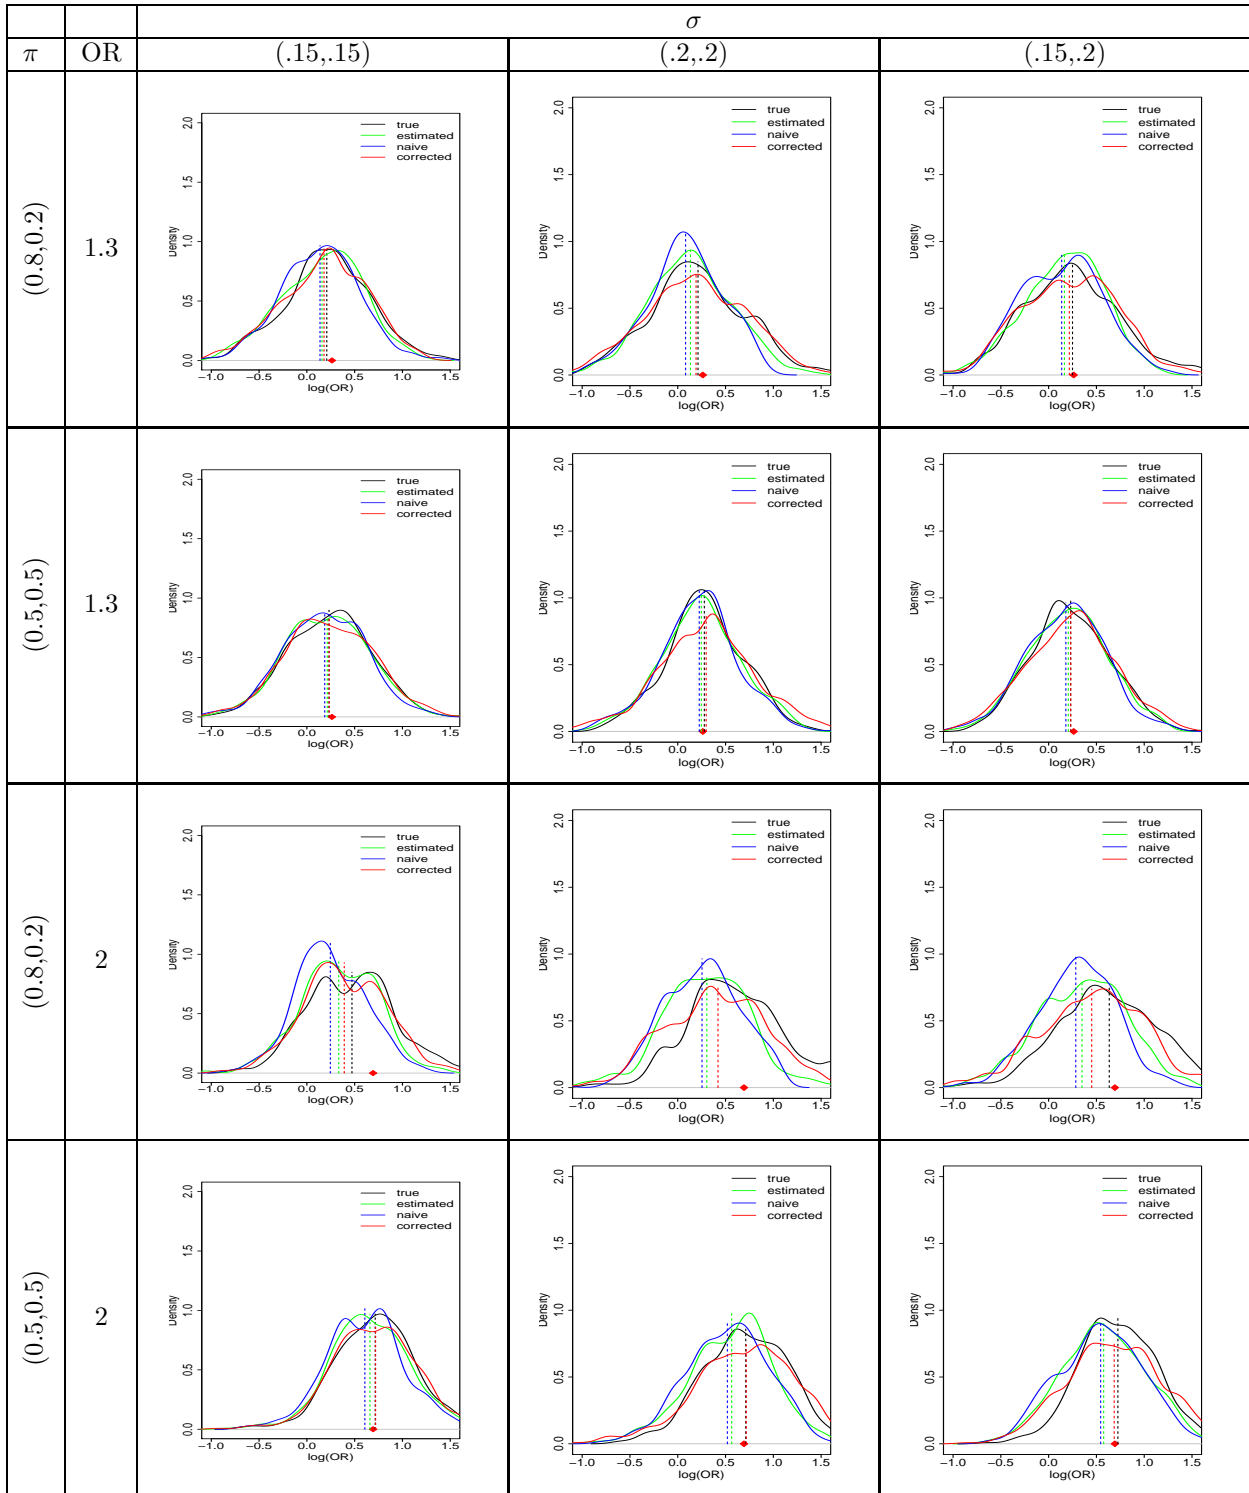

Figure S4. Empirical distribution of effect estimates (log OR) for each copy number status. Results for 1000 simulated case-control data sets (50/50), for different degrees of association (e.g. different OR) and different distributions of quantitative CNV measurements (e.g. varying clustering quality)

**Table S1. Simulation study.** Empirical coverage and power obtained in 1,000 simulations using the three different approaches, NAIVE, THRES and LC (see text for a description of each). Results are given for different scenarios, varying the number of individuals ( $I$ ), the proportion of individuals with each copy number status ( $\pi$ ), the odds ratio ( $e^\beta$ ), and the variance for CNV quantitative measurements. The table also shows the variance of parameter estimates using the asymptotic (ASYM) variance compared with the empirical (EMP) variance.

| I   | $\pi$ | $e^\beta$ | $\sigma$    | $\sigma_{\hat{\beta}}$ |        | Coverage (%) |       |       |      | Power (%) |       |       |      |
|-----|-------|-----------|-------------|------------------------|--------|--------------|-------|-------|------|-----------|-------|-------|------|
|     |       |           |             | EMP                    | ASYM   | SIM          | NAIVE | THRES | LC   | SIM       | NAIVE | THRES | LC   |
| 50  | 0.8   | 1.3       | (0.15,0.15) | 0.5821                 | 0.5898 | 94.2         | 96.2  | 95.8  | 96.8 | 6.6       | 5.4   | 6.4   | 4.6  |
| 50  | 0.8   | 1.3       | (0.2,0.2)   | 0.5679                 | 0.6605 | 93.0         | 94.0  | 93.0  | 96.2 | 5.2       | 4.8   | 4.2   | 3.6  |
| 50  | 0.8   | 1.3       | (0.15,0.2)  | 0.5326                 | 0.5846 | 96.6         | 96.2  | 95.4  | 97.4 | 6.8       | 4.8   | 4.8   | 3.0  |
| 50  | 0.8   | 2         | (0.15,0.15) | 0.6382                 | 0.6512 | 94.2         | 92.6  | 89.0  | 94.0 | 22.0      | 16.8  | 11.2  | 15.4 |
| 50  | 0.8   | 2         | (0.2,0.2)   | 0.6103                 | 0.7057 | 92.8         | 92.2  | 82.8  | 95.2 | 16.8      | 9.4   | 7.4   | 7.0  |
| 50  | 0.8   | 2         | (0.15,0.2)  | 0.6174                 | 0.6407 | 95.6         | 87.0  | 79.4  | 93.0 | 19.4      | 10.6  | 9.8   | 9.6  |
| 50  | 0.5   | 1.3       | (0.15,0.15) | 0.4168                 | 0.4367 | 94.0         | 94.2  | 95.2  | 93.8 | 11.6      | 10.0  | 9.2   | 10.0 |
| 50  | 0.5   | 1.3       | (0.2,0.2)   | 0.4298                 | 0.4838 | 94.6         | 93.8  | 94.0  | 95.4 | 12.6      | 7.0   | 7.0   | 7.2  |
| 50  | 0.5   | 1.3       | (0.15,0.2)  | 0.3984                 | 0.4578 | 95.2         | 95.2  | 95.2  | 95.6 | 11.4      | 8.6   | 9.4   | 8.2  |
| 50  | 0.5   | 2         | (0.15,0.15) | 0.4231                 | 0.4495 | 95.6         | 94.6  | 93.8  | 94.6 | 39.4      | 32.4  | 32.4  | 32.6 |
| 50  | 0.5   | 2         | (0.2,0.2)   | 0.4022                 | 0.5020 | 97.0         | 95.0  | 94.6  | 98.2 | 42.2      | 23.8  | 23.2  | 25.2 |
| 50  | 0.5   | 2         | (0.15,0.2)  | 0.4345                 | 0.4696 | 94.4         | 93.4  | 94.4  | 95.6 | 47.4      | 30.8  | 29.8  | 33.4 |
| 300 | 0.8   | 1.3       | (0.15,0.15) | 0.2291                 | 0.2341 | 94.0         | 94.0  | 89.2  | 93.2 | 20.4      | 15.2  | 17.0  | 17.8 |
| 300 | 0.8   | 1.3       | (0.2,0.2)   | 0.2208                 | 0.2667 | 94.6         | 94.4  | 88.6  | 96.4 | 23.0      | 17.0  | 11.0  | 16.2 |
| 300 | 0.8   | 1.3       | (0.15,0.2)  | 0.2192                 | 0.2373 | 94.2         | 93.6  | 89.2  | 96.0 | 23.4      | 15.8  | 13.2  | 18.0 |
| 300 | 0.8   | 2         | (0.15,0.15) | 0.2452                 | 0.2610 | 94.2         | 93.6  | 66.0  | 94.6 | 85.4      | 78.4  | 58.6  | 79.2 |
| 300 | 0.8   | 2         | (0.2,0.2)   | 0.2334                 | 0.2996 | 95.8         | 89.8  | 43.2  | 96.0 | 84.2      | 60.8  | 42.6  | 66.6 |
| 300 | 0.8   | 2         | (0.15,0.2)  | 0.2455                 | 0.2591 | 93.8         | 83.0  | 43.8  | 94.6 | 85.8      | 62.8  | 44.8  | 67.4 |
| 300 | 0.5   | 1.3       | (0.15,0.15) | 0.1711                 | 0.1775 | 93.6         | 93.8  | 94.0  | 93.8 | 37.0      | 30.8  | 31.2  | 32.4 |
| 300 | 0.5   | 1.3       | (0.2,0.2)   | 0.1709                 | 0.1970 | 94.4         | 93.8  | 92.8  | 93.6 | 36.6      | 24.4  | 25.0  | 28.2 |
| 300 | 0.5   | 1.3       | (0.15,0.2)  | 0.1582                 | 0.1866 | 96.8         | 95.2  | 94.4  | 95.2 | 34.6      | 22.8  | 24.6  | 25.2 |
| 300 | 0.5   | 2         | (0.15,0.15) | 0.1621                 | 0.1823 | 95.8         | 95.2  | 90.4  | 95.8 | 98.4      | 96.8  | 93.0  | 97.2 |
| 300 | 0.5   | 2         | (0.2,0.2)   | 0.1692                 | 0.2030 | 96.2         | 84.0  | 82.4  | 96.0 | 99.2      | 89.4  | 90.0  | 94.2 |
| 300 | 0.5   | 2         | (0.15,0.2)  | 0.1793                 | 0.1904 | 95.4         | 88.2  | 83.0  | 95.2 | 98.2      | 92.4  | 88.2  | 94.4 |

**Table S2. Simulation study.** Empirical coverage and power obtained in 1,000 simulations using the three different approaches: NAIVE, THRES and LC (read text to have a description of each one. LCa means LC using Newton-Raphson procedure and LCb is LC using bootstrap approach). The results are given for different scenarios varying number of individuals ( $I$ ), proportion of individuals in each copy number status ( $pi$ ), odds ratio ( $e^\beta$ ) and variance for CNV quantitative measurements. The table also shows the variance of parameter estimates using the asymptotic (ASYM) variance and variance obtained using bootstrap procedure (BOOT) compared with the empirical (EMP) variance.

| n   | $\pi$ | $e^\beta$ | $\sigma$    | $\sigma_{\hat{\beta}}$ |        |        | Coverage (%) |       |       |      |      | Power (%) |       |       |      |      |
|-----|-------|-----------|-------------|------------------------|--------|--------|--------------|-------|-------|------|------|-----------|-------|-------|------|------|
|     |       |           |             | EMP                    | ASYM   | BOOT   | SIM          | NAIVE | THRES | LCa  | LCb  | SIM       | NAIVE | THRES | LCa  | LCb  |
| 50  | 0.8   | 1.3       | (0.15,0.15) | 0.4539                 | 0.5629 | 0.6234 | 66.4         | 66.4  | 65.4  | 66.8 | 66.2 | 1.6       | 1.2   | 1.6   | 1.2  | 1.4  |
| 50  | 0.8   | 1.3       | (0.2,0.2)   | 0.5064                 | 0.5985 | 0.6730 | 58.0         | 58.0  | 57.0  | 59.4 | 58.2 | 2.6       | 1.4   | 0.6   | 0.8  | 1.2  |
| 50  | 0.8   | 1.3       | (0.15,0.2)  | 0.5412                 | 0.5547 | 0.5991 | 76.2         | 75.8  | 74.6  | 76.6 | 76.2 | 4.2       | 1.8   | 3.6   | 1.6  | 2.4  |
| 50  | 0.8   | 2         | (0.15,0.15) | 0.4677                 | 0.5886 | 0.6609 | 43.0         | 42.0  | 39.2  | 42.8 | 42.8 | 3.6       | 1.2   | 1.2   | 1.4  | 1.8  |
| 50  | 0.8   | 2         | (0.2,0.2)   | 0.5105                 | 0.6312 | 0.7813 | 46.4         | 43.6  | 39.0  | 45.8 | 45.8 | 6.4       | 2.2   | 3.0   | 2.6  | 4.6  |
| 50  | 0.8   | 2         | (0.15,0.2)  | 0.5589                 | 0.6021 | 0.7131 | 66.8         | 61.8  | 58.4  | 65.6 | 65.2 | 10.4      | 5.6   | 4.0   | 4.6  | 6.4  |
| 50  | 0.5   | 1.3       | (0.15,0.15) | 0.4357                 | 0.4377 | 0.4517 | 94.0         | 93.8  | 94.0  | 94.0 | 93.2 | 10.2      | 9.4   | 7.6   | 7.6  | 8.4  |
| 50  | 0.5   | 1.3       | (0.2,0.2)   | 0.4042                 | 0.4864 | 0.5055 | 93.8         | 92.6  | 93.2  | 93.0 | 92.0 | 12.0      | 9.6   | 9.0   | 8.8  | 10.4 |
| 50  | 0.5   | 1.3       | (0.15,0.2)  | 0.4180                 | 0.4572 | 0.4765 | 95.0         | 95.2  | 94.6  | 95.6 | 94.4 | 10.2      | 7.6   | 5.6   | 7.4  | 8.8  |
| 50  | 0.5   | 2         | (0.15,0.15) | 0.4134                 | 0.4500 | 0.4682 | 95.0         | 95.2  | 95.8  | 94.8 | 93.0 | 42.4      | 36.4  | 34.0  | 34.6 | 37.2 |
| 50  | 0.5   | 2         | (0.2,0.2)   | 0.4461                 | 0.5010 | 0.5272 | 91.8         | 89.8  | 90.4  | 91.6 | 90.8 | 42.0      | 29.0  | 27.4  | 30.0 | 33.4 |
| 50  | 0.5   | 2         | (0.15,0.2)  | 0.4059                 | 0.4670 | 0.4860 | 94.2         | 92.0  | 90.8  | 94.0 | 91.4 | 42.0      | 31.0  | 30.6  | 32.4 | 35.2 |
| 300 | 0.8   | 1.3       | (0.15,0.15) | 0.2167                 | 0.2357 | 0.2381 | 95.6         | 96.4  | 91.6  | 96.4 | 95.6 | 23.8      | 18.2  | 14.6  | 19.8 | 23.0 |
| 300 | 0.8   | 1.3       | (0.2,0.2)   | 0.2001                 | 0.2680 | 0.2717 | 96.6         | 95.0  | 89.0  | 96.2 | 94.6 | 23.2      | 16.2  | 10.8  | 15.8 | 19.4 |
| 300 | 0.8   | 1.3       | (0.15,0.2)  | 0.2132                 | 0.2371 | 0.2400 | 95.8         | 94.4  | 90.2  | 95.0 | 94.0 | 23.2      | 14.6  | 12.8  | 16.6 | 19.2 |
| 300 | 0.8   | 2         | (0.15,0.15) | 0.2398                 | 0.2592 | 0.2644 | 95.2         | 94.2  | 64.0  | 96.0 | 94.2 | 85.8      | 74.6  | 55.2  | 78.2 | 79.6 |
| 300 | 0.8   | 2         | (0.2,0.2)   | 0.2469                 | 0.2963 | 0.3065 | 93.6         | 87.2  | 38.2  | 95.6 | 94.0 | 86.0      | 56.0  | 39.2  | 63.2 | 66.0 |
| 300 | 0.8   | 2         | (0.15,0.2)  | 0.2395                 | 0.2589 | 0.2633 | 94.4         | 82.8  | 42.2  | 94.4 | 92.8 | 86.2      | 61.0  | 42.8  | 65.0 | 68.6 |
| 300 | 0.5   | 1.3       | (0.15,0.15) | 0.1580                 | 0.1774 | 0.1779 | 95.8         | 96.2  | 94.4  | 95.8 | 94.6 | 35.6      | 28.6  | 27.6  | 29.8 | 32.4 |
| 300 | 0.5   | 1.3       | (0.2,0.2)   | 0.1742                 | 0.1967 | 0.1968 | 93.0         | 92.0  | 92.0  | 92.8 | 91.6 | 38.6      | 27.2  | 23.4  | 28.2 | 31.6 |
| 300 | 0.5   | 1.3       | (0.15,0.2)  | 0.1686                 | 0.1864 | 0.1878 | 94.0         | 93.8  | 92.4  | 94.6 | 94.2 | 36.6      | 25.6  | 25.2  | 26.6 | 29.2 |
| 300 | 0.5   | 2         | (0.15,0.15) | 0.1642                 | 0.1825 | 0.1834 | 96.4         | 94.2  | 89.4  | 95.2 | 94.2 | 99.0      | 97.0  | 93.8  | 97.4 | 97.8 |
| 300 | 0.5   | 2         | (0.2,0.2)   | 0.1681                 | 0.2033 | 0.2054 | 95.4         | 86.8  | 80.4  | 94.4 | 92.4 | 98.6      | 90.4  | 88.2  | 94.6 | 94.4 |
| 300 | 0.5   | 2         | (0.15,0.2)  | 0.1647                 | 0.1903 | 0.1911 | 96.2         | 89.4  | 84.4  | 94.2 | 92.4 | 98.8      | 93.6  | 91.2  | 95.4 | 95.4 |
